1 **Global transcriptome analysis of *Stenotrophomonas maltophilia* in response to growth at**  
2 **human body temperature**

3 Prashant P. Patil<sup>1, \$, ^</sup>, Sanjeet Kumar<sup>1, #, ^</sup>, Amandeep Kaur<sup>1</sup>, Samriti Midha<sup>1, †</sup>, Kanika  
4 Bansal<sup>1</sup> and Prabhu B. Patil<sup>1, \*</sup>

5 <sup>1</sup>Bacterial Genomics and Evolution Laboratory, CSIR-Institute of Microbial Technology,  
6 Chandigarh, India.

7 <sup>^</sup>Equal Contribution

8 **Current Affiliations**

9 <sup>\$</sup> Department of Microbiology, School of Medicine, University of Washington, Seattle, WA,  
10 USA.

11 <sup>#</sup> Imperial Life Sciences (P) Limited, Gurgaon, Haryana, 122001, India

12 <sup>†</sup>Institute of Infection, Veterinary and Ecological Sciences, University of Liverpool,  
13 Liverpool, United Kingdom.

14 **\*Address for correspondence**

15 Prabhu B. Patil

16 Principal Scientist

17 Bacterial Genomics and Evolution Laboratory

18 CSIR- Institute of Microbial Technology, Chandigarh, India.

19 Email : [pbpatil@imtech.res.in](mailto:pbpatil@imtech.res.in)

20 Telephone : +91-172-6665245

21 <http://orcid.org/0000-0003-2720-1059>

22 **Keyword**

23 RNA-Seq, *Stenotrophomonas maltophilia*, thermoregulation, transcriptome

24 **Repositories:**

25 Gene Expression Omnibus database (accession number: GES101926).

## 26 **Abstract**

27 *Stenotrophomonas maltophilia* (Smal) is a typical example of an environmental originated  
28 opportunistic human pathogen, which can thrive at different habitats including the human  
29 body and can cause a wide range of infections. It must cope with heat stress during transition  
30 from the environment to the human body as the physiological temperature of the human body  
31 (37 °C) is higher than environmental niches (22-30 °C). Interestingly, *S. rhizophila* a  
32 phylogenetic neighbour of Smal within genus *Stenotrophomonas* is unable to grow at 37 °C.  
33 Thus, it is crucial to understand how Smal is adapted to human body temperature, which  
34 could suggest its evolution as an opportunistic human pathogen. In this study, we have  
35 performed comparative transcriptome analysis of *S. maltophilia* grown at 28 °C and 37 °C as  
36 temperature representative for environmental niches and human body respectively. RNA-Seq  
37 analysis revealed several interesting findings showing alterations in gene expression levels at  
38 28 °C and 37 °C, which can play an important role during infection. We have observed  
39 downregulation of genes involved in cellular motility, energy production and metabolism,  
40 replication and repair whereas upregulation of VirB/D4 Type IV secretion system, aerotaxis,  
41 cation diffusion facilitator family transporter and LacI family transcriptional regulators at 37  
42 °C. Microscopy and plate assays corroborated altered expression of genes involved in  
43 motility. The results obtained enhance our understanding of the strategies employed by *S.*  
44 *maltophilia* during adaptation towards the human body.

## 45 **Impact statement**

46 *Stenotrophomonas maltophilia* (Smal) is a WHO listed multidrug resistant nosocomial  
47 pathogen. Interestingly, *S. maltophilia* species can grow both at 28 °C and 37 °C unlike its  
48 closest taxonomic relative, i.e., *S. rhizophila* and also majority species belonging this genus.  
49 Hence this ability to grow at 37 °C, i.e., human body temperature might have played key role  
50 in the unique success and emergence of this species as opportunistic human pathogen. Using  
51 transcriptome sequencing, we have identified set of genes which are differentially regulated  
52 at 37 °C and investigated their evolutionary history. This study has revealed regulation of  
53 genes involved in motility, metabolism, energy, replication, transcription, aerotaxis and a  
54 type IV secretion system might have a role in successful adaption to a distinct lifestyle. The

55 findings will be helpful in further systematic studies on understanding and management of an  
56 emerging human pathogen such as Smal.

## 57 Introduction

58 Variation in temperature is one of the most crucial stress factors for pathogens of  
59 environmental origin during adaptation to the human body, as temperature of the external  
60 biosphere is generally 22-30 °C. There are different molecular mechanisms by which bacteria  
61 sense and respond to changes in temperature. Moreover, temperature is one of the critical  
62 signals that influences the different bacterial processes. In bacterial pathogens of mammals  
63 including *Shigella*, *Yersinia*, *Pseudomonas* etc., the body temperature of host, i.e. 37 °C  
64 induces the expression of virulence factors (White-Ziegler, Malhowski et al. 2007, Wurtzel,  
65 Yoder-Himes et al. 2012). Temperature is one of the important signals that a mammalian  
66 pathogen uses to regulate the virulence trait once it has entered its warm-blooded host  
67 (Konkel and Tilly 2000). In contrast, in pathogens of plants and ectothermic hosts such as  
68 fish, molluscs and amphibians, virulence gene expression is elevated at the lower  
69 temperatures, suggesting a role of temperature in the coordination of bacterial pathogenesis  
70 and virulence (Shapiro and Cowen 2012, Lam, Wheeler et al. 2014). Recently discovered  
71 RNA thermometers are an interesting tool in bacteria for responding to such external  
72 temperature stresses. They are RNA structures formed at the 5' UTR regions of transcripts  
73 specifying regulatory proteins responsible for expression of virulence-associated traits, which  
74 blocks translation initiation of genes at non-permissive temperatures (Kortmann and  
75 Narberhaus 2012).

76 Genus *Stenotrophomonas* comprises several species from diverse range of niches such as *S.*  
77 *lactitubi* and *S. indicatrix* from food, *S. bentonitica* and *S. chelatiphaga* from soil etc. (Patil,  
78 Midha et al. 2016, Patil, Kumar et al. 2018). *S. maltophilia* (Smal) is a ubiquitous bacterium  
79 which has emerged as multi drug-resistant global opportunistic pathogen in  
80 immunocompromised patients (Looney, Narita et al. 2009, Brooke 2012, Brooke 2014). Smal  
81 is a versatile bacterium, which adapts a wide range of environments and it is the only  
82 validated species among *Stenotrophomonas* genus, which causes human and animal-  
83 associated infections (Ryan, Monchy et al. 2009, Patil, Kumar et al. 2018). Apart from this  
84 detrimental effect, Smal has an extraordinary range of activities such as plant growth

85 promotion, degradation of anthropogenic pollutants and production of biomolecules (Ryan,  
86 Monchy et al. 2009, Mukherjee and Roy 2016). Presence of such a wide range of properties  
87 makes this bacterium an important biotechnological candidate, but the pathogenic potential of  
88 this bacterium limits its use for biotechnological applications (Mukherjee and Roy 2016). The  
89 comparison of the Smal with *S. rhizophila*, a non-pathogenic and phylogenetically related  
90 species, revealed that *S. rhizophila* lacks crucial virulence factors and heat shock proteins  
91 (Alavi, Starcher et al. 2014). *S. rhizophila* is unable to grow at human body temperature, 37  
92 °C due to the absence of heat shock genes and upregulation of genes involved in suicidal  
93 mechanisms (Alavi, Starcher et al. 2014). Thus, it is essential to understand the adaptation of  
94 rapidly emerging multidrug resistance opportunistic pathogen Smal to human body  
95 temperature, which is considered as the first step towards transition from environment to the  
96 human body.

97 Advances in high-throughput sequencing approaches will accurately quantify levels of  
98 expression of mRNA (RNA-Seq) thus, providing significant advances over microarrays  
99 (Croucher and Thomson 2010, Trapnell, Hendrickson et al. 2013, Creecy and Conway 2015).  
100 To understand the genetic response, mechanistic basis and factors involved in the successful  
101 adaptation of the *S. maltophilia* at human body temperature, we systematically examined the  
102 transcriptome during the growth at 28 °C and 37 °C using RNA-Seq experiments.

## 103 **Methods**

### 104 **Bacterial strain and growth condition**

105 *S. maltophilia* strain MTCC 434<sup>T</sup>, which is isogenic with the ATCC 13637<sup>T</sup> was used in all  
106 experiments. *S. maltophilia* ATCC 13637<sup>T</sup> was grown in Luria Bertani Miller Broth with  
107 shaking at 200 rpm at either 37 °C or 28 °C.

### 108 **Total RNA extraction, Quantification and Integrity estimation**

109 *S. maltophilia* ATCC 13637<sup>T</sup> was grown in 20 ml Luria Bertani Broth, Miller in 100 ml  
110 Erlenmeyer flask at 37 °C and 28 °C under constant agitation at RPM 200 (Supplementary Fig  
111 1). Samples were withdrawn at intervals for optical density monitoring at 600 nm (OD<sub>600</sub>),  
112 and cells from both cultures were harvested at mid-log phase (OD<sub>600</sub> = 0.8 to 1) by  
113 centrifugation at 6000 rpm at for 10 min at 4 °C and immediately frozen at -80 °C or

114 proceeded to the RNA isolation. For isolation of RNA, the pellet was resuspended in the 1 ml  
115 of TRIzol (Invitrogen, Carlsbad, CA, USA) and dissolved by vigorous mixing. The  
116 supernatant was transferred into a clean tube which contained one volume of 100% ethanol  
117 mixed by repeated gentle inversion. The RNA was purified and treated with DNase by using  
118 the Direct-zol RNA MiniPrep kit (Zymo Research Corporation, Orange, CA, USA),  
119 according to the manufacturer's recommendation. The purity of isolated total RNA, was  
120 determined by using the NanoDrop (Thermo Scientific, Wilmington, DE, USA) and  
121 quantified by using Qubit (Invitrogen, Carlsbad, CA, USA). Agilent Bioanalyzer with  
122 Agilent RNA 6000 Nano Kit (Agilent Technologies, Palo Alto, CA, USA) was used as per  
123 manufacturer's guidelines to assess the integrity of RNA samples. The RNA samples with  
124 RNA Integrity Number (RIN) > 8 were selected for cDNA synthesis and subsequent Illumina  
125 library construction (Supplementary Fig 1).

#### 126 **Ribosomal RNA depletion, cDNA library preparation and Illumina sequencing**

127 The ScriptSeq complete kit (Epicentre, Illumina, Madison, WI USA), a combined kit for the  
128 ribosomal (rRNA) depletion Ribo-Zero™ Kit (Bacteria) (Epicentre, Illumina, Madison, WI  
129 USA) and cDNA library construction kit, ScriptSeq™ v2 RNA-Seq library preparation kit  
130 (Epicentre, Illumina, Madison, WI USA) was used for this purpose. Total 5 µg of RNA was  
131 used for rRNA depletion by using Ribo-Zero™ (Epicentre, Illumina, Madison, WI USA) kit  
132 and purified by using Qiagen-RNeasy miniElute (Qiagen GmbH, Hilden, Germany) Clean-up  
133 kit. The Ribo-Zero treated RNA was quantified by using Agilent Bioanalyzer RNA 6000 Pico  
134 Kit (Agilent Technologies, CA, USA) and further used for the cDNA synthesis by using  
135 ScriptSeq™ v2 RNA-Seq kit (Epicentre, Illumina, Madison, WI USA). The cDNA was  
136 purified using AMPure XP (Beckman Coulter, Brea, CA, USA) beads and multiplexed by  
137 using ScriptSeq Index PCR Primers (Epicentre, Illumina, Madison, WI USA). cDNA  
138 libraries were quantified by using KAPA Illumina Library Quantification kit (KAPA  
139 Biosystems, Wilmington, MA). Finally, six libraries, which contains the biological triplicate  
140 of *S. maltophilia* ATCC 13637<sup>T</sup> cultured at 28 °C (SM\_28\_R1, SM\_28\_R2, SM\_28\_R3) and  
141 37 □ (SM\_37\_R1, SM\_37\_R2, SM\_37\_R3) were pooled and sequenced using in-house  
142 Illumina MiSeq (Illumina, Inc., San Diego, CA, USA) platform with 2 ×75 bp paired end run.

#### 143 **RNA-Seq data analysis**

144 The indexing adapters were trimmed by MiSeq control software during the base calling and  
145 read quality assessment was done using FastQC version 0.11.2 (Andrews, 2010; Babraham  
146 Bioinformatics, Cambridge, UK). The complete genome sequences of *S. maltophilia* ATCC  
147 13637<sup>T</sup> (Accession No: NZ\_CP008838) was downloaded from NCBI-GenBank  
148 ([https://www.ncbi.nlm.nih.gov/genome/880?genome\\_assembly\\_id=2052953](https://www.ncbi.nlm.nih.gov/genome/880?genome_assembly_id=2052953)) and used as a  
149 reference for aligning the reads by using Bowtie 2 (Langmead and Salzberg 2012). The  
150 aligned SAM files generated by bowtie were sorted using samtools v1.4.1 (Li, Handsaker et  
151 al. 2009). The obtained BAM files were used as input to *cufflinks* v2.2.1 (Trapnell, Williams  
152 et al. 2010, Trapnell, Roberts et al. 2012, Trapnell, Hendrickson et al. 2013), which was used  
153 to assemble transcripts with FPKM (*fragments per kilobase of transcript per million mapped*  
154 *reads*) values. The data files for the replicates were merged into single transcript with  
155 *Cuffmerge* and differential gene expression analysis between both condition, i.e. 28 °C and 37  
156 °C was performed using the *Cuffdiff*, a package of the *cufflinks* v2.2.1 (Trapnell, Williams et  
157 al. 2010, Trapnell, Roberts et al. 2012, Trapnell, Hendrickson et al. 2013). The output data  
158 from *Cuffdiff* were imported to *cummeRbund* v2.18.0 (Goff, Trapnell et al. 2013), which is  
159 based on R statistical package version 3.4.0 for visualization. Supplementary Figure 2 shows  
160 the workflow employed for differential gene expression analysis using RNA-Seq. Gene  
161 expression data were deposited to the Gene Expression Omnibus database (accession  
162 number: GES101926).

### 163 **qRT-PCR validation of the differentially expressed genes**

164 To confirm some of the differential expressed genes obtained using RNA-Seq, a conventional  
165 real-time quantitative reverse transcription-PCR (qRT-PCR) was employed to measure  
166 changes in the mRNA level of each gene. Gene-specific primers of the differentially  
167 expressed genes were designed by using primer3 tool (<http://bioinfo.ut.ee/primer3-0.4.0/>) and  
168 listed in supplementary table 2. RNA was isolated from bacterial cells grown at 28 °C and 37  
169 °C as described earlier. The quantitative real-time PCR assay was performed with  
170 SuperScript III Platinum SYBR Green One-Step qRT-PCR kit (Thermo Scientific,  
171 Wilmington, DE, USA). For each sample, three technical replicates were included, and  
172 reactions were set up according to manufacturer's guidelines. The amplification conditions  
173 were: cDNA synthesis 50 °C for 45 minutes, initial denaturation at 95 °C for 5 minutes, 40  
174 cycles of denaturation at 95 °C for 15 seconds followed by annealing at 60 °C for 30 seconds

175 and extension at 40 °C for 30 seconds. Melting curve analysis confirmed that all PCRs  
176 amplified a single product. Gene expression levels were normalized to 16S rRNA gene and  
177 *ftsZ* gene. The relative expression of each gene at 37 °C relative to 28 °C was expressed as fold  
178 change calculated by using  $2^{-\Delta\Delta Ct}$  method. The resulting fold change values were converted to  
179  $\log_2$  fold value and were plotted against the  $\log_2$  fold of RNA-Seq data.

## 180 **Functional categorization of differentially expressed genes**

181 eggNOG v4.5.1, a database (Huerta-Cepas, Szklarczyk et al. 2015) of orthologous groups and  
182 functional annotation was used to classify genes differentially expressed at 28 °C and 37 °C  
183 into functional categories based on Clusters of Orthologous Groups (COG).

184

185 All the full length differentially expressed genes obtained from the RNA-Seq experiment  
186 were fetched from all the type strains of genus *Stenotrophomonas maltophilia* complex (Smc  
187 complex) using tBlastn (Camacho, Coulouris et al. 2009). Cut-off for similarity was set to be  
188 60% and coverage was 50%. All the differentially expressed genes from reference genome  
189 ATCC 13637<sup>T</sup> were annotated using eggNOG-mapper v2 (Huerta-Cepas, Szklarczyk et al.  
190 2015). Based on the presence and absence of the gene a heatmap was constructed using  
191 GENE-Ev3.0.215 (<https://www.broadinstitute.org/>).

## 192 **Transmission electron microscopy**

193 Transmission electron microscopy was used to visualize the morphology of the flagella at 28  
194 °C and 37 °C. Bacterial cultures were grown in 20ml LB and incubated at 28 °C and 37 °C  
195 respectively until OD<sub>600nm</sub> reaches to 0.8. The cells were harvested by centrifugation at  
196 2000 rpm for 10 minutes. The cell pellet was washed twice with 1X PBS (Invitrogen,  
197 Carlsbad, CA, USA) and finally suspended in 50µl of 1X PBS (Invitrogen, Carlsbad, CA,  
198 USA). 10-20µl of bacterial suspension was placed on a carbon-coated copper grid (300 mesh,  
199 Nisshin EM Co., Ltd.) for 15 minutes. The grid was then negatively stained for 30 seconds  
200 with 2% phosphotungstic acid, dried and examined using JEM 2100 transmission electron  
201 microscope (JEOL, Tokyo, Japan) operating at 200 kV.

## 202 **Motility Assays**



203 Motility patterns of *Stenotrophomonas maltophilia* ATCC 13637<sup>T</sup> were assessed by using  
204 motility media. For swimming motility, 5µl of overnight grown culture was spotted on plates  
205 containing 1% tryptone, 0.5% NaCl and 0.3% agar. Similarly, for swarming motility 5µl of  
206 overnight grown culture was spotted on plates containing 1% tryptone, 0.5% NaCl and 0.5%  
207 agar. Plates were incubated at 28 °C and 37 °C for 7 days. Twitching motility was evaluated on  
208 plates containing 1% tryptone, 0.5% NaCl and 1.2% agar. A bacterial colony was stabbed  
209 deep into the agar to the bottom with the help of a sterile toothpick. Plates were incubated at  
210 28 °C and 37 °C for 7 days. Then, to check twitching motility, agar was removed, and plates  
211 were stained with 0.1 % crystal violet. Motility assays were carried out on three biological  
212 replicates.

### 213 **Growth curve measurements**

214 The growth curves at two temperatures i.e. 28 °C and 37 °C was generated by growing  
215 bacterial culture at 28 °C and 37 °C overnight. 1% of the overnight grown culture (OD=0.8 -  
216 1.0) was then inoculated in fresh 50ml LB with an initial OD<sub>600nm</sub> 0.015. Readings were  
217 taken every 1 hour for 32 hours at OD<sub>600nm</sub>.

## 218 **Results and Discussion**

### 219 **Comparative transcriptome analyses of Smal during growth at 28 °C and 37 °C**

220 To determine the genetic mechanism underlying adaptation of Smal at human body  
221 temperature, we performed RNA-Seq analysis on three biological replicates of Smal grown at  
222 28 °C and 37 °C (Supplementary Figure 1).

223 A total 4,676,670, 9,477,113, 7,989,000 and 3,536,078, 11,310,235 and 14241935  
224 sequencing reads were obtained for three biological replicates for growth at 28 °C  
225 (SM\_28\_R1, SM\_28\_R2, SM\_28\_R3) and 37 °C (SM\_37\_R1, SM\_37\_R2, SM\_37\_R3)  
226 respectively. Reads from all replicates were mapped to the reference genome *S. maltophilia*  
227 ATCC 13637<sup>T</sup> with overall mapping frequency ranging from 87% to 94% (Supplementary  
228 Table 1).

229 To identify differentially expressed genes at 37 °C, we compared transcript profiles of *S.*  
230 *maltophilia* ATCC 13637<sup>T</sup> grown at 28 °C and 37 °C. The global transcriptional profiles for



231 two conditions were obtained by data normalization and statistical analysis (Supplementary  
232 Figure 2). A matrix of pairwise comparison based on the FPKM (Fragments Per Kilobase of  
233 transcript per Million mapped reads) values between two conditions was obtained. It was  
234 used to generate the volcano plot (Figure 1A) to map the fold change in transcript expression  
235 against its statistical significance (p-values).

236 Total 51 genes were differentially expressed when the *S. maltophilia* ATCC 13637<sup>T</sup> was  
237 grown at 37 °C as compared to growth at 28 °C with the statistically significant cut off values:  
238  $p$ -value < 0.05,  $q$ -value < 0.001 and  $\log_2$  fold change > 2. Among differentially expressed  
239 genes, 13 genes (accounting for the 25% of differentially expressed genes) were upregulated  
240 (Table 1) while 38 genes (accounting for 75%) were downregulated at 37 °C as compared to  
241 the 28 °C (Table 2). The classification of differentially expressed genes by COG (cluster of  
242 orthologous groups) revealed that genes in sixteen COG classes were differentially expressed  
243 (Figure 1 B). The most COG categories for which the greater number of the genes were  
244 differentially expressed are intracellular trafficking and secretion, signal transduction, cell  
245 motility and with unknown function (Figure 1 B). The differentially expressed genes  
246 belonging to the cell motility; secondary structure; post-translational modification; replication  
247 and repair; translation; lipid metabolism; coenzyme metabolism; nucleotide metabolism and  
248 transport; amino acid metabolism and transport classes were downregulated at 37 °C.

249 To partially validate the differentially expressed genes during growth at 37 °C as compared to  
250 at 28 °C, we performed the qRT-PCR analysis of selected genes. We have analyzed the  
251 expression profiles of randomly selected twelve differentially expressed genes at 37 °C and 28  
252 °C (Figure 2). We have used 16S rRNA and *ftsZ* genes as internal control. High correlation  
253 ( $R^2 = 0.9135$ ) between expression levels of genes measured by the RNA-Seq and qRT-PCR  
254 was observed (Figure 2).

### 255 **Temperature dependent regulation of cell motility**

256 Majority of the differentially expressed genes belong to the cell motility category, and all of  
257 them were downregulated at 37 °C. These include isoforms of a gene (DP16\_RS19060,  
258 DP16\_RS19065), which encodes for fimbrial outer membrane protein and type I fimbrial  
259 proteins, fimbrial proteins (DP16\_RS19075), fimbrial chaperone (DP16\_RS19070), methyl-  
260 accepting chemotaxis (DP16\_RS03855), flagellin (DP16\_RS11160), methyl-accepting

261 chemotaxis protein (DP16\_RS21325), CheV chemotaxis protein (DP16\_RS11100) and  
262 methyl-accepting chemotaxis DP16\_RS22960. The methyl-accepting chemotaxis proteins  
263 and CheV chemotaxis protein are categorized into signal transduction class along with GTP-  
264 binding protein TypA (DP16\_RS17970), histidine kinase (DP16\_RS08460), and signal  
265 transduction protein with HDOD domain (DP16\_RS21040), which were also down regulated  
266 (Table 2).

267 In order to check the phenotypic effect of downregulation of the cell motility and chemotaxis  
268 genes at 37 °C, we have performed the swimming and swarming motility assay during growth  
269 at 28 °C and 37 °C. The swimming and swarming motility is affected at 37 °C as compared to  
270 that of 28 °C (Figure 3 A and B). Further, downregulation of genes involved in flagellin  
271 biosynthesis leads to the development of less or impaired flagella at 37 °C as compared to the  
272 28 °C, which was observed in transmission electron microscopy. (Figure 3 C). The impaired  
273 flagella ultimately affect the motility at 37 °C as compared to the 28 °C. Taken together, these  
274 observations suggest the thermoregulation of cell motility in *S. maltophilia*.

275 In bacterial pathogens, it is now a well-known fact that virulence-related traits are generally  
276 overexpressed at physiological temperature, i.e. 37 °C (Konkel and Tilly 2000). The  
277 repression of motility genes at 37 °C to avoid the host recognition was also reported in  
278 *Listeria monocytogenes*, which is a foodborne pathogen of environmental origin (Gründling,  
279 Burrack et al. 2004). In *Listeria monocytogenes*, *mogR* transcriptional repressor of flagellar  
280 genes along with a protein thermometer *gmaR* which represses flagellar biosynthesis at 37 °C.  
281 The temperature dependent regulation of motility was observed in several human and plant  
282 pathogens like *Yersinia enterocolitica*, *Listeria monocytogenes*, *Escherichia coli* and  
283 *Pseudomonas syringae* (Kapatral, Olson et al. 1996, Kamp and Higgins 2011, Hockett, Burch  
284 et al. 2013, Sciandrone, Forti et al. 2019).

285 The flagella and fimbriae serve as pattern recognition molecule (PAMP), which activate  
286 innate immune response in the host cell, thus act as an essential virulence factor for Smal  
287 (Zgair and Chhibber 2010). Despite the important role of flagellin and fimbria genes in the  
288 Smal pathogenesis, these genes were downregulated at 37 °C suggesting that it is an adaptive  
289 mechanism by which Smal avoids host recognition and subsequent host innate immune  
290 response. In Smal *FsnR* is a canonical positive regulator directly or indirectly controlling the

291 transcription of most flagellar genes by binding to the promoter region of the flagellar  
292 biosynthesis gene cluster (Kang, Wang et al. 2015). There might be an involvement of the  
293 unidentified protein thermometer, which along with the FsnR may regulate the temperature-  
294 dependent flagellar motility. The chemotaxis involves selective movements by using flagella  
295 and pili towards nutrients or to escape from hostile environments. There is downregulation of  
296 the multiple key genes involved in chemotaxis, which is in accordance with the  
297 downregulation of the flagellin genes.

### 298 **Downregulation of genes involved in energy production, metabolism and protein** 299 **synthesis**

300 The expression of two genes involved in energy production and conservation were  
301 downregulated at 37 °C. These include the ATP synthase subunit beta (DP16\_RS01805) and  
302 C4-dicarboxylate transporter (DP16\_RS01020) responsible for uptake of fumarate, succinate  
303 and malate, which are essential intermediates in TCA cycle. Apart from this, there is also  
304 downregulation of genes belonging to translation, amino acid metabolism and transport,  
305 replication and repair, inorganic ion and transport metabolism lipid metabolism, coenzyme  
306 metabolism was observed at 37 °C. Down-regulated genes belong to inorganic ion transport  
307 and metabolism category, including phosphate-selective porin O and P (DP16\_RS01055),  
308 iron uptake factor (DP16\_RS02290) and protein of unknown function with domain DUF47  
309 (DP16\_RS13710). The data suggested that downregulation of two genes involved in  
310 translation (DP16\_RS15085, DP16\_RS00510), which encodes for a protein that removes the  
311 N-terminal methionine from nascent proteins and 50S ribosomal protein L31 type b. The  
312 genes belonging to COG class: Post-translational modification, protein turnover, chaperone  
313 functions DP16\_RS20730 (peptidylprolyl cis-trans isomerase), nucleotide metabolism and  
314 transport, DP16\_RS12245 (ribosome biogenesis GTPase), amino acid metabolism and  
315 transport, DP16\_RS02690 (S-adenosylmethionine decarboxylase proenzyme),  
316 DP16\_RS02840 (Dihydroorotate dehydrogenase), Energy production and conversion  
317 DP16\_RS01020 (Sodium dicarboxylate symporter family), DP16\_RS01805 (ATP synthase  
318 subunit B) were also downregulated. The isoforms of the genes DP16\_RS20765  
319 (Exodeoxyribonuclease 7 small subunit) and DP16\_RS20770 (Polyprenyl synthetase)  
320 belonged to COG classes replication and repair, coenzyme metabolites respectively were  
321 downregulated at 37 °C. The downregulation of genes involved in energy production and

322 metabolism; translation is reflected in the lower growth rate of *S. maltophilia* ATCC 13637<sup>T</sup>  
323 at 37 °C as compared to 28 °C (Supplementary Figure 3). This also suggests a reduction in  
324 energy production processes in *S. maltophilia* ATCC 13637<sup>T</sup> may represent a survival  
325 strategy during adaptation at human body temperature.

### 326 **Upregulation of VirB/D4 Type IV secretion system at 37 °C**

327 Comprehensive functional and COG analyses of upregulated genes revealed that five pivotal  
328 genes DP16\_RS07185/*virB4* (log<sub>2</sub> FC=3.04), DP16\_RS07180/*trbJ* (log<sub>2</sub> FC=2.6),  
329 DP16\_RS07200/*virB1* (log<sub>2</sub> FC=2.6), DP16\_RS07205/*virB11* (log<sub>2</sub> FC=2.34) and  
330 DP16\_RS07175/*virB6* (log<sub>2</sub> FC=2.2) that are part of Type IV VirB/D4 secretory system,  
331 were upregulated at 37 °C (Table 1). The expression of the VirB/D4 T4SS components *virB4*,  
332 *trbJ*, *virB1*, *virB11* and *virB6* was higher at 37 °C suggesting that VirB/D4 T4SS in *S.*  
333 *maltophilia* ATCC 13637<sup>T</sup> is regulated by the temperature. T4SS in *Smal* is horizontally  
334 acquired and present on the genomic island. It is present in the eight other non-clinical  
335 species of genus *Stenotrophomonas*, i.e., *S. chelatiphaga*, *S. daejeonensis*, *S. ginsengisoli*, *S.*  
336 *indicatrix*, *S. koreensis*, *S. lactitubi*, *S. pavanii*, and *S. pictorum* (Nas, White et al. 2019). The  
337 VirB/D4 T4SS is absent in the *S. acidaminiphila*, *S. nitritireducens*, *S. panacihumi*, *S.*  
338 *rhizophila*, and *S. terrae* (Nas, White et al. 2019). Apart from the role in conjugation, T4SSs  
339 also play an important role in the pathogenic mechanism of many animal pathogens *Legionella*  
340 *pneumophila*, *Bordetella pertussis*, *Coxiella burnetii*, *Bartonella henselae*, *Brucella* spp. and  
341 *Helicobacter pylori* as well as plant pathogen *Agrobacterium tumefaciens* (Souza, Oka et al.  
342 2015, Gonzalez-Rivera, Bhatta et al. 2016). VirB/D4 T4SS of *S. maltophilia* is related to the  
343 well-known plant pathogens of *Xanthomonas* species, a phylogenetic relative of *Smal*, which  
344 mediates killing of the other bacterial cell by T4SS but not involved in virulence (Souza, Oka  
345 et al. 2015). In the latest study by Nas et al. suggested that VirB/D4 T4SS in *Smal* inhibits the  
346 apoptosis in an epithelial cell to enhance attachment while it promotes apoptosis in infected  
347 mammalian macrophages to escape from phagocytosis (Nas, White et al. 2019). The study  
348 further revealed that VirB/D4 T4SS in *Smal* stimulates the growth and mediates inter  
349 bacterial killing of other bacteria in the complex microbial community (Nas, White et al.  
350 2019). Thus, by considering the role of VirB/D4 T4SS in virulence, adaptation in the  
351 complex microbial community and its upregulation at 37 °C suggests a temperature-dependent  
352 strategy for pathoadaptation.

353 **Upregulation of the genes involved in the aerotaxis, cation diffusion facilitator family**  
354 **transporter and LacI family transcriptional regulators**

355 Interestingly, increased expression of genes involved in aerotaxis, which is also known as  
356 energy taxis at 37 °C. It is a behavioural response that guides bacterial cells to navigate  
357 toward micro-environments where oxygen concentration, energy sources, and redox potential  
358 are optimal for growth (Taylor, Zhulin et al. 1999). This process is coordinated by aerotaxis  
359 receptor *Aer*, which measures redox potential. It infers energy levels *via* a flavin adenine  
360 dinucleotide (FAD) cofactor bound to a cytoplasmic PAS domain (Taylor and Zhulin 1999,  
361 Campbell, Watts et al. 2011). In *S. maltophilia* ATCC 13637<sup>T</sup>, two genes (DP16\_RS19060  
362 and DP16\_RS19065) that encode for FAD-binding domain protein and PAS sensor domain-  
363 containing protein (Bouckaert, Heled et al.) are transcribed as single transcript and are  
364 overexpressed at 37 °C. This may help *Smal* to adapt and colonize different niches with a  
365 different oxygen gradient. Thus, further experiments are required to understand the role of  
366 aerotaxis in *Smal* adaptation to human host and virulence. Reports are citing the role of  
367 aerotaxis in an adaptation of *C. jejuni* at human gut with different oxygen gradient and in  
368 *Ralstonia solanacearum* it is required for the biofilm formation (Hazeleger, Wouters et al.  
369 1998, Yao and Allen 2007). The role of the aerotaxis in virulence of bacteria is not fully  
370 understood, but it plays an important role in the adaptation of bacterium toward its host  
371 (Henry and Crosson 2011).

372 Among the upregulated gene, DP\_RS06915 (log<sub>2</sub> FC=2.0), that code for cation diffusion  
373 facilitator (CDF) family transporter is important for the transition of metals efflux from the  
374 cytosol to periplasm. CDF transporter plays a role in the transition metal tolerance, i.e.,  
375 exporting metal surplus from cell to avoid excessive accumulation and toxicity. Apart from  
376 the role in the transition metals efflux, they also participate in the infection process in *P.*  
377 *aeruginosa* (Salusso and Raimunda 2017). As the transcription of CDF was increased at 37 °C  
378 and by considering its possible role in the infection process, it is necessary to assess the role  
379 of CDF in virulence and adaption of *Smal*.

380 The transcription regulator of LacI family DP16\_RS10420 is overexpressed (log<sub>2</sub> FC=2.2) at  
381 37 °C. This family of transcriptional regulators is known to play an essential role in the  
382 carbohydrate uptake or metabolism and virulence (Van Gijsegem, Wlodarczyk et al. 2008,

383 Njoroge, Nguyen et al. 2012, Ravcheev, Khoroshkin et al. 2014). Upregulation of the gene  
384 *fruR*, which is a transcription factor and belongs to the LacI family was observed at 37 °C,  
385 suggesting it may play an important role in adaptation and virulence. Two genes containing  
386 the domain of unknown function DUF 4189 (DP16\_RS23790, DP16\_RS23785) and one gene  
387 that encode a hypothetical protein were upregulated at 37 °C. Isoforms of the genes  
388 DP16\_RS19060 and DP16\_RS19065 which codes for sulphite reductase subunit alpha with  
389 FAD-binding domain and PAS sensor domain-containing protein is also overexpressed (log<sub>2</sub>  
390 FC=2.9) at 37 °C. Therefore, future studies are needed to reveal the role of these genes in  
391 infection and adaptation to human body temperature.

### 392 **Human body temperature is not heat stress for Smal**

393 From differential expression analysis of Smal at two temperatures, we observed a significant  
394 downregulation of gene for cold shock protein (*cspA2*), which belongs to transcription COG  
395 class is downregulated (log<sub>2</sub> FC= -2.1) at 37 °C suggesting its role in adaptation to lower  
396 environmental temperature. Despite the presence of heat shock chaperons in Smal, we did not  
397 find differential gene expression of heat shock response genes, which is generally indicative  
398 of heat stress. This suggests that Smal has evolved to thrive at human body temperature  
399 without a need to activate protective surveillance responses against heat stress. Overall, this  
400 emphasizes that human body temperature is not heat stress for Smal. This kind of response  
401 was also reported in the environmentally originated opportunistic pathogen *Pseudomonas*  
402 *aeruginosa* during growth at 37 °C (Wurtzel, Yoder-Himes et al. 2012).

403 In addition to clinical, *S. maltophilia* complexes have species from diverse lifestyles. Here,  
404 we looked for status of all the 49 pathoadaptive or differentially expressed genes status in all  
405 the species of Smc (Figure 4). Interestingly, ShlB/FhaC/HecB family hemolysin  
406 secretion/activation protein (DP16\_RS23075) and hypothetical protein (DP16\_RS23790) are  
407 unique to Sma which can be correlated with its clinical lifestyle. While, motility and T4SS  
408 genes in few of the other species genus *Stenotrophomonas*. Energy production, metabolism  
409 and transcription regulators are largely present in all the species of Smc. Overall  
410 phylogenomic based transcriptomic understanding reveals that the transition and success of *S.*  
411 *maltophilia* species in the genus has been intricate by modulating functions related to immune  
412 evasion as seen by downregulation of flagella, protection from host defense responses as seen



413 by downregulation of genes involved in motility apart from other cellular processes related to  
414 physiology, replication and transcription (Figure 5). Further molecular genetic studies on the  
415 differentially expressed that are unique to *Sma* may allow understanding success of this  
416 species as opportunistic human pathogen.

## 417 **Conclusion**

418 Current work is a high-resolution comprehensive comparative analysis of RNA-Seq based  
419 transcriptome of opportunistic pathogen *S. maltophilia*. This study has provided a framework  
420 for studying the molecular mechanism underlying transition of an environmental bacterium to  
421 become a successful human pathogen. The study also suggests how *S. maltophilia* is a matter  
422 of grave concern to the immunocompromised patient. Further, studies on the characterization  
423 of differentially expressed genes of *S. maltophilia* at physiological temperature will give  
424 more insights into its adaptation to human host and pathogenesis.

425

## 426 **Author statements**

### 427 **Authors and contributors**

428 PPP, SM, SK has prepared the RNA-Seq library preparation and performed transcriptome  
429 sequencing on Illumina MiSeq platform. PPP, SK and KB have performed computational  
430 analysis of RNA-Seq data analysis. PPP and AK has performed motility assay, growth curve  
431 and validation of differentially expressed genes by RT-qPCR. AK, SK and PPP performed  
432 transmission electron microscopy (TEM). PPP has drafted the manuscript with inputs from  
433 SK, KB and AK. PBP and PPP have conceived and designed the experiments with inputs  
434 from SK, AK and KB.

### 435 **Conflicts of interest**

436 The authors declare that there are no conflicts of interest.

### 437 **Funding information**

438 This work is supported by Research Council approved projects of CSIR-IMTECH, OLP-148  
439 and OLP-601 to PBP. All authors declare no conflict of interests. PPP is acknowledging  
440 Senior Research Fellowship from University Grant Commission, New Delhi. SM and SK  
441 fellowship from Council of Scientific and Industrial Research, India. AK is supported by



442 Senior Research Fellowship from INSPIRE scheme of the Department of Sciences and  
443 technology, Government of India.

444

## 445 **References**

446 Alavi, P., et al. (2014). "Stenotrophomonas comparative genomics reveals genes and  
447 functions that differentiate beneficial and pathogenic bacteria." BMC genomics **15**(1): 482.

448

449 Bansal, K., et al. (2020). "Deep phylo-taxono-genomics (DEEPT genomics) reveals  
450 misclassification of Xanthomonas species complexes into Xylella, Stenotrophomonas and  
451 Pseudoxanthomonas." BioRxiv.

452

453 Bouckaert, R., et al. (2014). "BEAST 2: a software platform for Bayesian evolutionary  
454 analysis." PLoS computational biology **10**(4): e1003537.

455

456 Brooke, J. S. (2012). "Stenotrophomonas maltophilia: an emerging global opportunistic  
457 pathogen." Clinical microbiology reviews **25**(1): 2-41.

458

459 Brooke, J. S. (2014). New strategies against Stenotrophomonas maltophilia: a serious  
460 worldwide intrinsically drug-resistant opportunistic pathogen, Taylor & Francis.

461

462 Camacho, C., et al. (2009). "BLAST+: architecture and applications." BMC bioinformatics  
463 **10**(1): 421.

464

465 Campbell, A. J., et al. (2011). "Role of the F1 region in the Escherichia coli aerotaxis  
466 receptor Aer." Journal of bacteriology **193**(2): 358-366.

467

468 Creecy, J. P. and T. Conway (2015). "Quantitative bacterial transcriptomics with RNA-seq."  
469 Current opinion in microbiology **23**: 133-140.

470

471 Croucher, N. J. and N. R. Thomson (2010). "Studying bacterial transcriptomes using RNA-  
472 seq." Current opinion in microbiology **13**(5): 619-624.

473

474 Goff, L., et al. (2013). "cummeRbund: Analysis, exploration, manipulation, and visualization  
475 of Cufflinks high-throughput sequencing data." R package version **2**(0).

476

- 477 Gonzalez-Rivera, C., et al. (2016). "Mechanism and function of type IV secretion during  
478 infection of the human host." Microbiology spectrum **4**(3).
- 479
- 480 Gründling, A., et al. (2004). "Listeria monocytogenes regulates flagellar motility gene  
481 expression through MogR, a transcriptional repressor required for virulence." Proceedings of  
482 the National Academy of Sciences of the United States of America **101**(33): 12318-12323.
- 483
- 484 Hazeleger, W. C., et al. (1998). "Physiological activity of Campylobacter jejuni far below the  
485 minimal growth temperature." Applied and Environmental Microbiology **64**(10): 3917-3922.
- 486
- 487 Henry, J. T. and S. Crosson (2011). "Ligand-binding PAS domains in a genomic, cellular,  
488 and structural context." Annual review of microbiology **65**: 261-286.
- 489
- 490 Hockett, K. L., et al. (2013). "Thermo-regulation of genes mediating motility and plant  
491 interactions in Pseudomonas syringae." **8**(3): e59850.
- 492
- 493 Huerta-Cepas, J., et al. (2015). "eggNOG 4.5: a hierarchical orthology framework with  
494 improved functional annotations for eukaryotic, prokaryotic and viral sequences." Nucleic  
495 acids research **44**(D1): D286-D293.
- 496
- 497 Kamp, H. D. and D. E. J. P. P. Higgins (2011). "A protein thermometer controls temperature-  
498 dependent transcription of flagellar motility genes in Listeria monocytogenes." **7**(8):  
499 e1002153.
- 500
- 501 Kang, X.-M., et al. (2015). "Genome-wide identification of genes necessary for biofilm  
502 formation by nosocomial pathogen Stenotrophomonas maltophilia reveals that orphan  
503 response regulator FsnR is a critical modulator." Appl. Environ. Microbiol. **81**(4): 1200-  
504 1209.
- 505
- 506 Kapatral, V., et al. (1996). "Temperature-dependent regulation of Yersinia enterocolitica  
507 class III flagellar genes." **19**(5): 1061-1071.
- 508
- 509 Konkeli, M. E. and K. Tilly (2000). "Temperature-regulated expression of bacterial virulence  
510 genes." Microbes and Infection **2**(2): 157-166.
- 511
- 512 Kortmann, J. and F. Narberhaus (2012). "Bacterial RNA thermometers: molecular zippers  
513 and switches." Nature reviews. Microbiology **10**(4): 255.
- 514

- 515 Kumar, S., et al. (2019). "Phylogenomics insights into order and families of Lysobacterales."  
516 Access Microbiology **1**(2): e000015.
- 517
- 518 Lam, O., et al. (2014). "Thermal control of virulence factors in bacteria: A hot topic."  
519 Virulence **5**(8): 852-862.
- 520
- 521 Langmead, B. and S. L. Salzberg (2012). "Fast gapped-read alignment with Bowtie 2."  
522 Nature methods **9**(4): 357-359.
- 523
- 524 Li, H., et al. (2009). "The sequence alignment/map format and SAMtools." Bioinformatics  
525 **25**(16): 2078-2079.
- 526
- 527 Looney, W. J., et al. (2009). "Stenotrophomonas maltophilia: an emerging opportunist human  
528 pathogen." The Lancet infectious diseases **9**(5): 312-323.
- 529
- 530 Mukherjee, P. and P. Roy (2016). "Genomic potential of Stenotrophomonas maltophilia in  
531 Bioremediation with an Assessment of its Multifaceted Role in Our Environment." Frontiers  
532 in microbiology **7**.
- 533
- 534 Nas, M. Y., et al. (2019). "Stenotrophomonas maltophilia Encodes a VirB/D4 Type IV  
535 Secretion System That Modulates Apoptosis in Human Cells and Promotes Competition  
536 Against Heterologous Bacteria Including Pseudomonas aeruginosa." Infection and Immunity:  
537 IAI. 00457-00419.
- 538
- 539 Njoroge, J. W., et al. (2012). "Virulence meets metabolism: Cra and KdpE gene regulation in  
540 enterohemorrhagic Escherichia coli." MBio **3**(5): e00280-00212.
- 541
- 542 Patil, P. P., et al. (2018). "Taxonogenomics reveal multiple novel genomospecies associated  
543 with clinical isolates of Stenotrophomonas maltophilia." Microbial genomics **4**(8).
- 544
- 545 Patil, P. P., et al. (2016). "Genome sequence of type strains of genus Stenotrophomonas."  
546 Frontiers in microbiology **7**: 309.
- 547
- 548 Ravcheev, D. A., et al. (2014). "Comparative genomics and evolution of regulons of the  
549 LacI-family transcription factors." Frontiers in microbiology **5**.
- 550
- 551 Ryan, R. P., et al. (2009). "The versatility and adaptation of bacteria from the genus  
552 Stenotrophomonas." Nature reviews. Microbiology **7**(7): 514.
- 553

- 554 Salusso, A. and D. Raimunda (2017). "Defining the Roles of the Cation Diffusion Facilitators  
555 in Fe<sup>2+</sup>/Zn<sup>2+</sup> Homeostasis and Establishment of their Participation in Virulence in  
556 *Pseudomonas aeruginosa*." Frontiers in cellular and infection microbiology **7**.
- 557  
558 Sciandrone, B., et al. (2019). "Temperature-dependent regulation of the *Escherichia coli* lpxT  
559 gene." **1862**(8): 786-795.
- 560  
561 Shapiro, R. S. and L. E. Cowen (2012). "Thermal control of microbial development and  
562 virulence: molecular mechanisms of microbial temperature sensing." MBio **3**(5): e00238-  
563 00212.
- 564  
565 Souza, D. P., et al. (2015). "Bacterial killing via a type IV secretion system." Nature  
566 communications **6**: 6453.
- 567  
568 Taylor, B. L. and I. B. Zhulin (1999). "PAS domains: internal sensors of oxygen, redox  
569 potential, and light." Microbiology and Molecular Biology Reviews **63**(2): 479-506.
- 570  
571 Taylor, B. L., et al. (1999). "Aerotaxis and other energy-sensing behavior in bacteria."  
572 Annual Reviews in Microbiology **53**(1): 103-128.
- 573  
574 Trapnell, C., et al. (2013). "Differential analysis of gene regulation at transcript resolution  
575 with RNA-seq." Nature biotechnology **31**(1).
- 576  
577 Trapnell, C., et al. (2012). "Differential gene and transcript expression analysis of RNA-seq  
578 experiments with TopHat and Cufflinks." Nature protocols **7**(3): 562.
- 579  
580 Trapnell, C., et al. (2010). "Transcript assembly and quantification by RNA-Seq reveals  
581 unannotated transcripts and isoform switching during cell differentiation." Nature  
582 biotechnology **28**(5): 511-515.
- 583  
584 Van Gijsegem, F., et al. (2008). "Analysis of the LacI family regulators of *Erwinia*  
585 *chrysanthemi* 3937, involvement in the bacterial phytopathogenicity." Molecular plant-  
586 microbe interactions **21**(11): 1471-1481.
- 587  
588 White-Ziegler, C. A., et al. (2007). "Human body temperature (37 C) increases the expression  
589 of iron, carbohydrate, and amino acid utilization genes in *Escherichia coli* K-12." Journal of  
590 bacteriology **189**(15): 5429-5440.
- 591

592 Wurtzel, O., et al. (2012). "The single-nucleotide resolution transcriptome of *Pseudomonas*  
593 *aeruginosa* grown in body temperature." PLoS pathogens **8**(9): e1002945.

594  
595 Yao, J. and C. Allen (2007). "The plant pathogen *Ralstonia solanacearum* needs aerotaxis for  
596 normal biofilm formation and interactions with its tomato host." Journal of bacteriology  
597 **189**(17): 6415-6424.

598  
599 Zgair, A. K. and S. Chhibber (2010). "Stenotrophomonas maltophilia flagellin induces a  
600 compartmentalized innate immune response in mouse lung." Journal of medical microbiology  
601 **59**(8): 913-919.

602

603

## 604 **Figures and tables**

605 **Figure 1: Transcriptional response of *S. maltophilia* ATCC 13637<sup>T</sup> at 37 °C.** A) Volcano  
606 plot showing the transcripts that fulfil both fold change (log<sub>2</sub> fold) and q-value <0.001 cut-  
607 offs. B) COG-based classification of differentially expressed genes of *S. maltophilia* at 37 °C.

608 **Figure 2: qRT-PCR validation of differentially expressed genes.** Expression profile of  
609 twelve genes by RNA-Seq and qRT-PCR.

610 **Figure 3: Temperature-dependent regulation of motility** A) Twiching motility of *S.*  
611 *maltophilia* ATCC 13637<sup>T</sup> observed during growth at 28 ° and 37 °. B) Swarming motility  
612 of *S. maltophilia* ATCC 13637<sup>T</sup> observed at growth 28° and 37°. C) Transmission electron  
613 micrographs of *S. maltophilia* ATCC 13637<sup>T</sup> grown at 28 ° and 37 ° on nutrient agar and  
614 negatively stained with 1% phosphotungstic acid.

615 **Figure 4:** Heatmap showing presence or absence of differentially expressed genes in Smc  
616 along with log<sub>2</sub> fold change of the genes at 37 ° as compared to 28 °. Genes related to (A)  
617 motility, (B) type IV secretion system, (C) energy, metabolism (D) aerotaxis, cation diffusion  
618 facilitator family transporter and LacI family transcription regulators and (E) others.

619 **Figure 5: (A)** Transition of Smal from environment to clinical settings **(B)** Schematic  
620 diagram of upregulated (purple) and downregulated (green) genes.

621 **Table 1:** *S. maltophilia* ATCC 13637<sup>T</sup> genes significantly up-regulated during the growth at  
622 37 °.

623 **Table 2:** *S. maltophilia* ATCC 13637<sup>T</sup> genes significantly down-regulated during growth at  
624 37 °C.

625

## 626 **Figures and Tables Legend of Supplementary files**

627 **Supplementary Figure 1: Experimental workflow for differential gene expression**  
628 **analysis of *S. maltophilia* grown at 28 °C and 37 °C.** R1, R2 and R3 denote the biological  
629 replicates.

630 **Supplementary Figure 2: Workflow employed for RNA-Seq data analysis for**  
631 **differential gene expression:** First quality reads from both conditions were mapped to the  
632 reference genome with Bowtie2. The mapping was done independently for each read from  
633 biological replicates. The mapped SAM files were converted to sorted BAM files using  
634 SAMtools. Sorted BAM files were given as input to *Cufflinks*, which produces unary  
635 assembled transcripts for each replicate. The assembly files were merged with reference  
636 transcriptome annotation into a unified annotation using *Cuffmerge* and used for further  
637 analysis. This merged annotation was quantified in each condition by *Cuffdiff*, which  
638 produces expression data in a set of tabular files. These files were

639 **Supplementary Figure 3: Growth curve measurements:** Growth curves of *S. maltophilia*  
640 ATCC 137637 at two temperatures, i.e., 28 °C and 37 °C

641 **Supplementary Table 1: Summary of Illumina RNA-Seq data generated.** *S. maltophilia*  
642 ATCC 13637 grown at 28 °C (SM\_28) and 37 °C (SM\_37) number (\_1, \_2, \_3) following  
643 SM\_28 and SM\_37 represents replicates for each condition.

644 **Supplementary Table 2: List of primers used in qRT-PCR for validation of RNA-Seq.**

A)

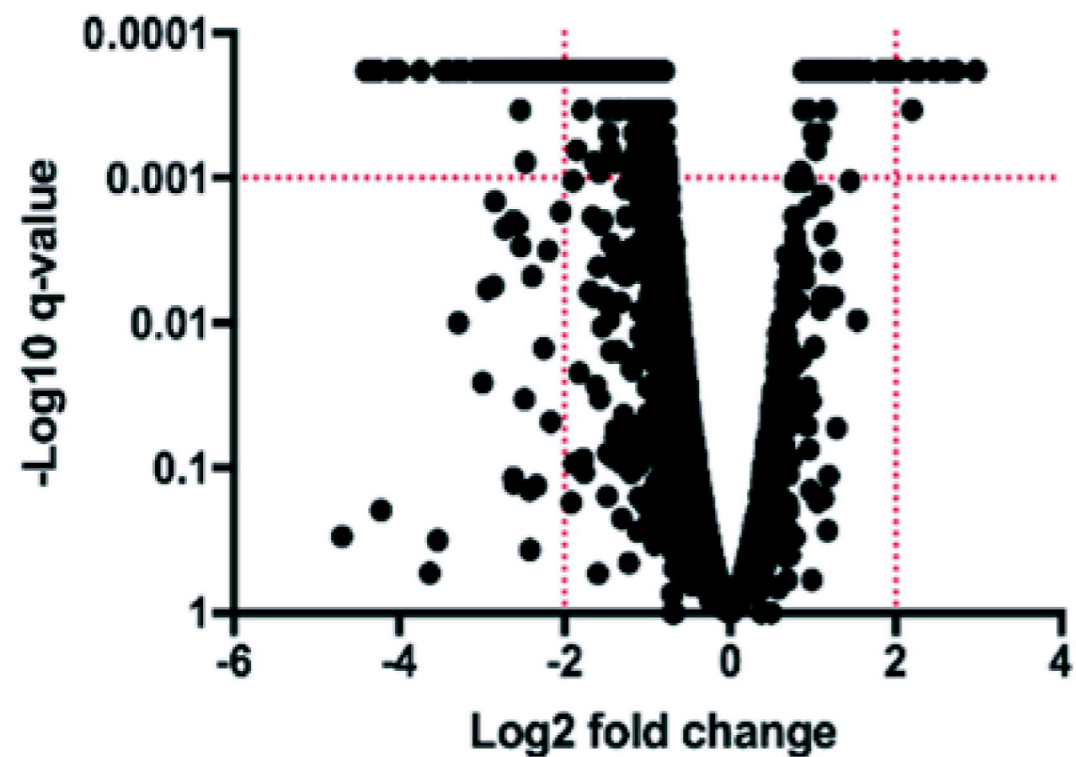

B)

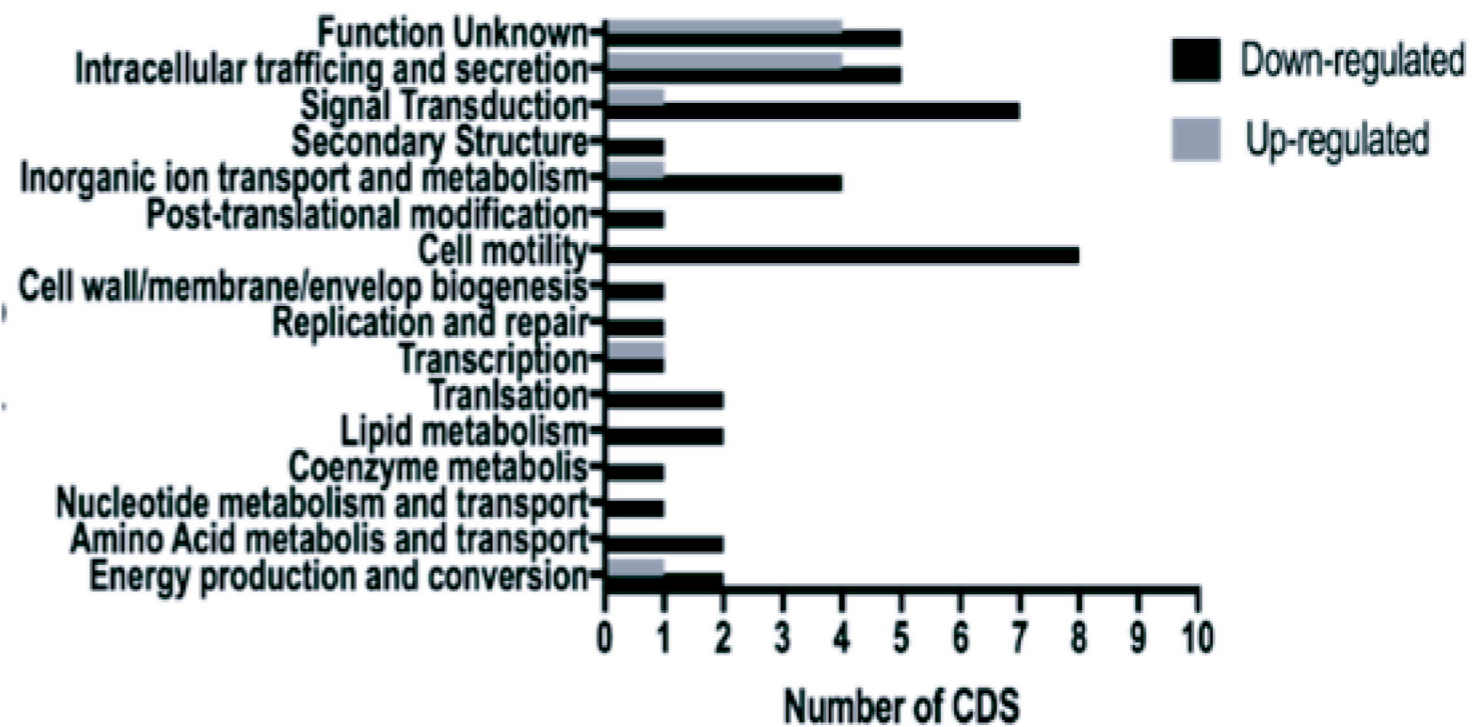



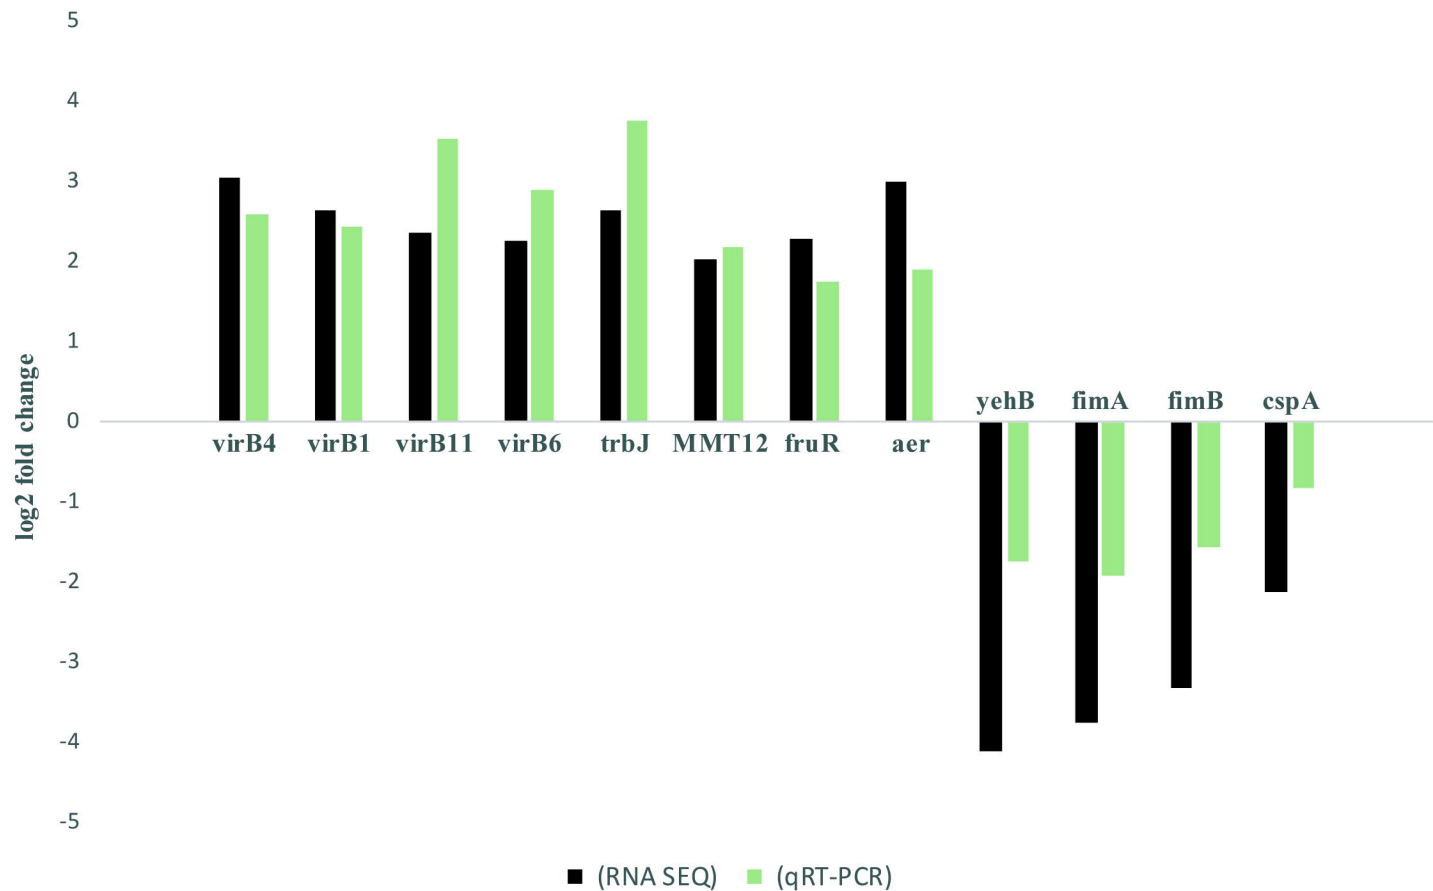

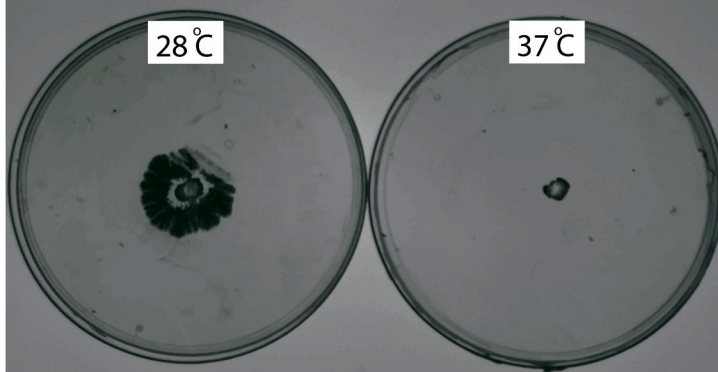

A. Twitching motility

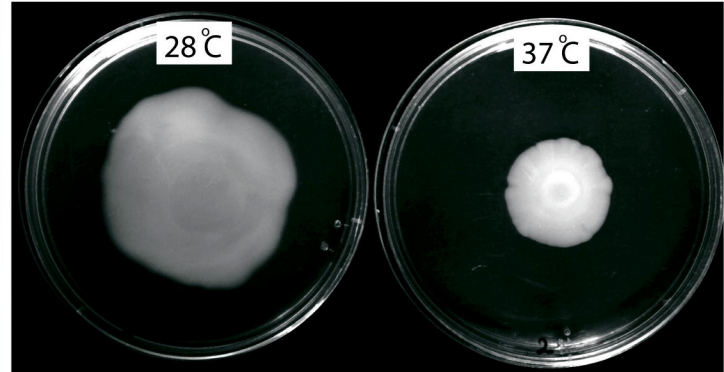

B. Swarming motility

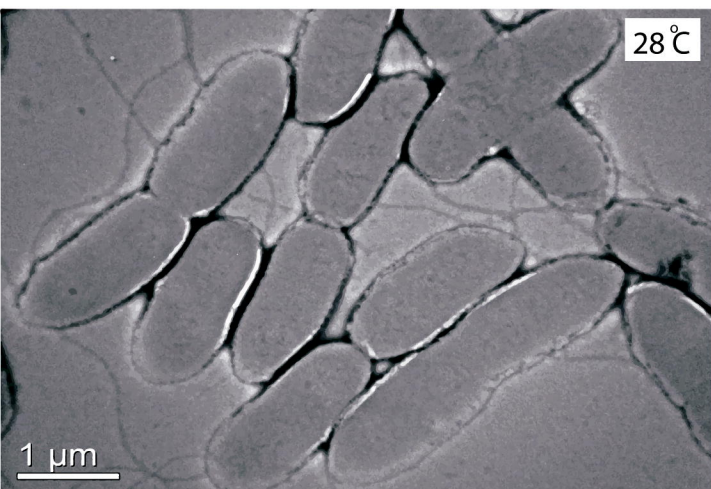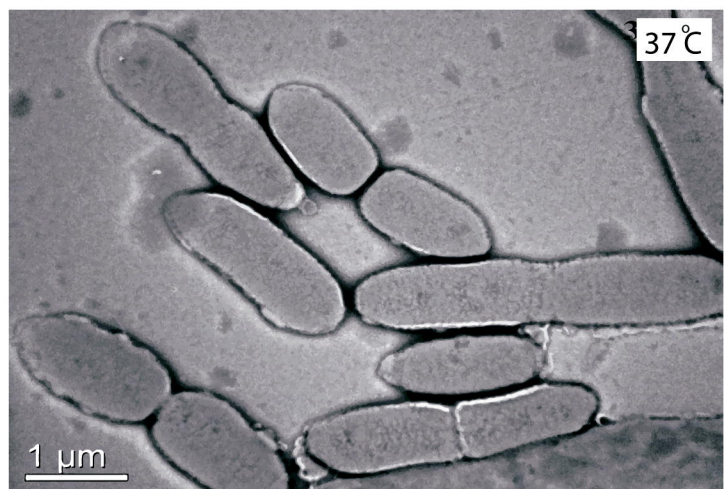

C. Transmission electron microscopy (TEM)





Environmental conditions

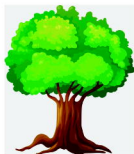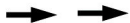

Physiological conditions

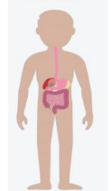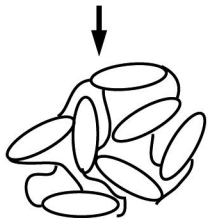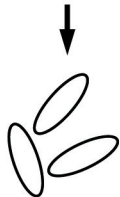

(A)

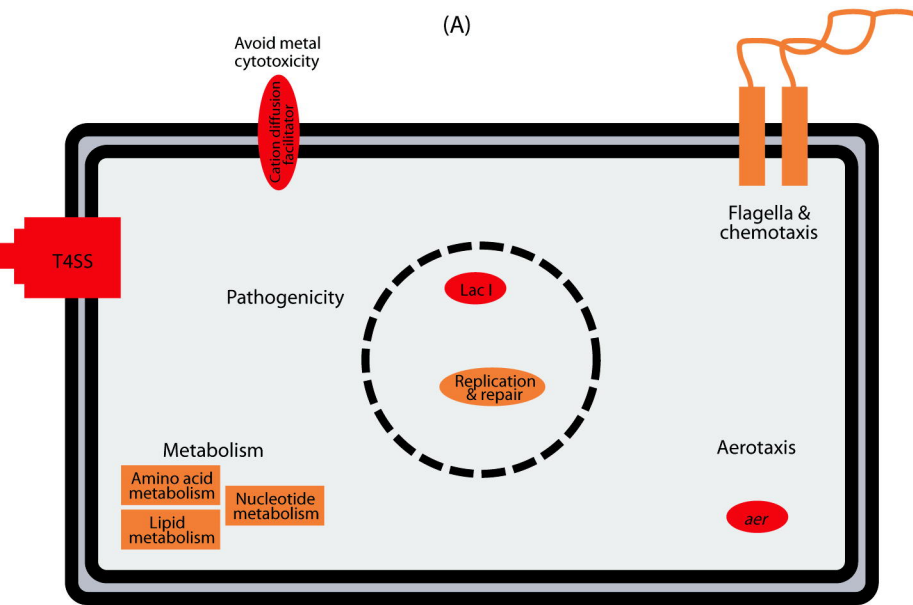

(B)
